# Supplementary material
Source: HighWire-hosted journal article supplement (https://bmjopen.bmj.com/content/12/8/e055672)
Supplement: inline-supplementary-material-2 [file inline-supplementary-material-2.pdf]

## Online Supplemental File 2: Tables and Figure

Online Supplemental File 2 for 'Global prevalence of nontuberculous mycobacteria in adults with non-cystic fibrosis bronchiectasis 2006-2021: a systematic review and meta-analysis'.

### Table of Contents

|                   |                                                                                                                                |          |
|-------------------|--------------------------------------------------------------------------------------------------------------------------------|----------|
| <b>Table S1</b>   | Search strings                                                                                                                 | Page 2   |
| <b>Table S2</b>   | Characteristics of studies included in the systematic review and meta-analysis                                                 | Page 3-4 |
| <b>Table S3</b>   | Ratings of the quality of the evidence and Risk of Bias assessment                                                             | Page 5-7 |
| <b>Table S4</b>   | Statistics and re-calculation of NTM subspecies                                                                                | Page 8   |
| <b>Figure S1</b>  | Re-calculating the prevalence of NTM in adults with non-cystic fibrosis bronchiectasis from 1990 to 2006 (Chu's study in 2014) | Page 9   |
| <b>References</b> | .....                                                                                                                          | Page 10  |

Table S1: Search strings

| Database and date                                           | Yield | Duplicates | Search String used                                                                                                                                                                                                                                                                                                                                                                                                                                                              |
|-------------------------------------------------------------|-------|------------|---------------------------------------------------------------------------------------------------------------------------------------------------------------------------------------------------------------------------------------------------------------------------------------------------------------------------------------------------------------------------------------------------------------------------------------------------------------------------------|
| Medline<br>Jan 31, 2022                                     | 414   | 0          | "Bronchiectasis" [Mesh] AND ("Nontuberculous Mycobacteria" OR "non tuberculous mycobacter" [Mesh]) AND ("Atypical Mycobacter" [Mesh] OR ("Mycobacter abscessus" [Mesh] OR "Mycobacter avium complex" [Mesh] OR "Mycobacter chelonae" [Mesh] OR "Mycobacter fortuitum" [Mesh] OR "Mycobacter kansasii" [Mesh] OR "Mycobacter marinum" [Mesh] OR "Mycobacter scrofulaceum" [Mesh] OR "Mycobacter smegmatis" [Mesh] OR "Mycobacter ulcerans" [Mesh] OR "Mycobacter xenopi" [Mesh]) |
| Embase<br>Jan 31, 2022                                      | 678   | 32         | "Bronchiectasis" [Mesh] AND ("Nontuberculous Mycobacteria" OR "non tuberculous mycobacter" [Mesh]) AND ("Atypical Mycobacter" [Mesh] OR ("Mycobacter abscessus" [Mesh] OR "Mycobacter avium complex" [Mesh] OR "Mycobacter chelonae" [Mesh] OR "Mycobacter fortuitum" [Mesh] OR "Mycobacter kansasii" [Mesh] OR "Mycobacter marinum" [Mesh] OR "Mycobacter scrofulaceum" [Mesh] OR "Mycobacter smegmatis" [Mesh] OR "Mycobacter ulcerans" [Mesh] OR "Mycobacter xenopi" [Mesh]) |
| Cochrane Library<br>Jan 31, 2022                            | 19    | 9          | Bronchiectasis AND Nontuberculous Mycobacteria" OR "non tuberculous mycobacter"                                                                                                                                                                                                                                                                                                                                                                                                 |
| Web of Science<br>Jan 31, 2022                              | 504   | 70         | "nontuberculous mycobacter" OR TOPIC: "non tuberculous mycobacter") OR TOPIC: "Atypical Mycobacter") OR TOPIC: (("Mycobacter abscessus" or "Mycobacter avium complex" OR "Mycobacter chelonae" OR "Mycobacter fortuitum" OR "Mycobacter* kansasii OR "Mycobacter marinum" OR "Mycobacter scrofulaceum" OR "Mycobacter smegmatis" OR "Mycobacter ulcerans" OR "Mycobacter xenopi")) OR TOPIC: "ntm"                                                                              |
| Total                                                       | 1615  | 111        |                                                                                                                                                                                                                                                                                                                                                                                                                                                                                 |
| Other sources<br>Jan 31, 2022                               | 514   |            | 'Nontuberculous Mycobacteria' OR 'non-cystic fibrosis bronchiectasis'; publication date from 2006 to 2021, including citations                                                                                                                                                                                                                                                                                                                                                  |
| 111 duplicates were removed to give a total of 2014 studies |       |            |                                                                                                                                                                                                                                                                                                                                                                                                                                                                                 |

**Table S2: Characteristics of studies included in the initial analysis of selected studies**

| Author; year                          | Country          | Data Source                               | Time of sampling | Mean age (Y) | Sample size  | Patients with NTM | Study design | Method of detection                    | NTM [%]     |
|---------------------------------------|------------------|-------------------------------------------|------------------|--------------|--------------|-------------------|--------------|----------------------------------------|-------------|
| 1. McShane, et al. 2012 [1]           | USA              | University Referral Center                | 2009-2011        | ≥18          | 106          | 9                 | RS           | Sputum culture                         | 8.5         |
| 2. Xu, et al. 2014 [2]                | China            | Pulmonary Hospital                        | 2009-2012        | 47.4         | 3857         | 431               | RS           | Sputum culture                         | 11.2        |
| 3. Guan, et al. 2015 [3]              | China            | Outpatient Respiratory Clinics            | 2012-2013        | 44.6         | 144          | 5                 | PS           | Sputum culture                         | 3.5         |
| 4. Kadowaki, et al. 2015 [4]          | Japan            | Medical Center                            | 2008-2012        | 73           | 147          | 26                | RS           | Sputum culture                         | 17.7        |
| <b>5. Máiz, et al. 2016 [5]</b>       | <b>Spain</b>     | <b>Teaching hospitals</b>                 | <b>2012-2015</b> | <b>55.7</b>  | <b>218</b>   | <b>18</b>         | <b>PS</b>    | <b>Sputum culture</b>                  | <b>8.3</b>  |
| 6. Izhakian, et al. [6] 2016          | Israel           | Rabin Medical Center                      | 2006-2014        | 64           | 339          | 29                | RS           | Bronchoalveolar lavage cultures        | 8.6         |
| 7. Faverio, et al. 2016 [7]           | Italy            | San Gerardo Hospital                      | 2006-2014        | 65           | 162          | 32                | PS           | Bronchoalveolar /sputum culture        | 19.8        |
| 8. Buscot, et al. 2016 [8]            | France           | University Hospital                       | 2002-2012        | 61.0         | 196          | 7                 | RS           | Sputum/ bronchoalveolar lavage culture | 3.6         |
| 9. Dimakou, et al. 2016 [9]           | Greece           | Hospital of Chest Diseases                | 2009-2014        | 60.5         | 205          | 2                 | PS           | Sputum culture                         | 0.9         |
| <b>10.* Park, et al. 2016 [10]</b>    | <b>Korea</b>     | <b>University Hospital &gt;5 years</b>    | <b>2003-2013</b> | <b>59.6</b>  | <b>155</b>   | <b>69</b>         | <b>RS</b>    | <b>Sputum/BAL culture</b>              | <b>44.5</b> |
| <b>11.* Aksamit, et al. 2017 [11]</b> | <b>USA</b>       | <b>Bronchiectasis Research Registry</b>   | <b>2008-2014</b> | <b>66</b>    | <b>1,314</b> | <b>653</b>        | <b>RS</b>    | <b>Sputum culture</b>                  | <b>49.7</b> |
| <b>12.* Hsieh, et al. 2018 [12]</b>   | <b>China</b>     | <b>Bronchiectasis Medical Center</b>      | <b>2005-2014</b> | <b>65.3</b>  | <b>96</b>    | <b>35</b>         | <b>RS</b>    | <b>Sputum culture</b>                  | <b>36.5</b> |
| 13. Sin, et al. 2019 [13]             | Korea            | National University Hospital              | 2005-2016        | 59.6         | 6957         | 1740              | RS           | Sputum culture                         | 25          |
| <b>14.* Amorim, et al. 2019 [14]</b>  | <b>Portugal</b>  | <b>Bronchiectasis Referral Center</b>     | <b>2011-2017</b> | <b>54.7</b>  | <b>186</b>   | <b>27</b>         | <b>PS</b>    | <b>Sputum culture</b>                  | <b>14.5</b> |
| <b>15.* Visser, et al. 2019 [15]</b>  | <b>Australia</b> | <b>Australian Bronchiectasis Registry</b> | <b>2016-2018</b> | <b>71</b>    | <b>169</b>   | <b>40</b>         | <b>PS</b>    | <b>Sputum culture</b>                  | <b>23.6</b> |
| 16. Pieters, et al. 2019 [16]         | Netherland       | University Medical Center                 | 2012-2016        | 60           | 120          | 6                 | RS           | Sputum culture                         | 5.0         |
| <b>17.* Dhar, et al. 2019 [17]</b>    | <b>India</b>     | <b>bronchiectasis registry</b>            | <b>2015-2017</b> | <b>56</b>    | <b>1299</b>  | <b>8</b>          | <b>PS</b>    | <b>Sputum culture</b>                  | <b>0.6</b>  |

Continued next page

| Author; year                           | Country      | Data Source                                       | Time of sampling | Mean age (Y) | Sample size | Patients with NTM | Study design | Method of detection   | NTM [%]     |
|----------------------------------------|--------------|---------------------------------------------------|------------------|--------------|-------------|-------------------|--------------|-----------------------|-------------|
| 18. Huang, et al. 2020 [18]            | China        | Medical Record Database                           | 2002-2016        | 65.5         | 8385        | 304               | RS           | Sputum culture        | 3.6         |
| 19. Darwish, et al. 2020 [19]          | Egypt;       | University Hospital                               | 2017-2018        | 55.2         | 40          | 3                 | PS           | Sputum PCR            | 7.5         |
| <b>20.* Kwak, et al. 2020 [20]</b>     | <b>Korea</b> | <b>Hospital</b>                                   | <b>2011-2019</b> | <b>62</b>    | <b>221</b>  | <b>35</b>         | <b>PS</b>    | <b>Sputum culture</b> | <b>15.8</b> |
| 21. Sharif, et al. 2020 [21]           | Pakistan     | Hospital                                          | 2017-2019        | NA           | 196         | 2                 | PS           | Sputum culture        | 1.0         |
| <b>22.* Choate, et al. 2021 [22]</b>   | <b>USA</b>   | <b>Bronchiectasis &amp; NTM Research Registry</b> | <b>2008-2018</b> | <b>63.7</b>  | <b>1831</b> | <b>885</b>        | <b>RS</b>    | <b>Sputum culture</b> | <b>48.3</b> |
| <b>23.* Metersky, et al. 2021 [23]</b> | <b>USA</b>   | <b>Bronchiectasis &amp; NTM Research Registry</b> | <b>NA-2020</b>   | <b>61.1</b>  | <b>410</b>  | <b>47</b>         | <b>PS</b>    | <b>Sputum culture</b> | <b>11.5</b> |
| 24. Yin, et al. 2021 [24]              | China        | Hospital                                          | 2018-2020        | 62           | 202         | 47                | RS           | Sputum/BAL culture    | 23.3        |

**Abbreviations:** NA: Not Available; NTM: Nontuberculous Mycobacteria; MBC: mycobacteria culture; AFB: acid fast bacillus smear; BAL: bronchoalveolar lavage; RS: Retrospective Study; PS: prospective Study; UK: United Kingdom; US: United States. PCR: Polymerase Chain Reaction.

**Note:** Bold type with an asterisk \* indicate the studies with source/selection bias. Please refer to the supplementary Table S3.

**Table S3: Ratings of the quality of the evidence and Risk of Bias assessment**

| Study                                      | Study Design                                | Domain                              | Source of bias              | Support for Judgement                                                                                                                                                   | Review Author's Judgement                                                                                                                                       | Risk of Bias |
|--------------------------------------------|---------------------------------------------|-------------------------------------|-----------------------------|-------------------------------------------------------------------------------------------------------------------------------------------------------------------------|-----------------------------------------------------------------------------------------------------------------------------------------------------------------|--------------|
| 1. McShane, et al. 2012; US [1]            | Retrospective cohort study                  | Attrition bias                      | Patient follow-up           | Of all 114 patients. Two declined consent, and six patients did not follow up with the evaluation.                                                                      | Eight patients were not available for the complete analysis.                                                                                                    | Low          |
| 2. Xu, et al. 2014; Shanghai, China [2]    | Retrospective cohort study                  | Detection bias                      | Detection bias              | Diagnosis criterium was at least one positive culture result of NTM.                                                                                                    | Only one positive culture result of NTM may be due to false positive or wrong operation.                                                                        | Low          |
| 3. Guan, et al. 2015; Guangzhou, China [3] | Prospective randomized control cohort study | Selection bias                      | Patient population          | Consecutively recruited from outpatient respiratory clinics.                                                                                                            | Mild and severe symptom patients were excluded                                                                                                                  | Medium       |
| 4. Kadowaki, et al. 2015; Japan [4]        | Retrospective cohort study                  | Selection bias                      | Patient selection           | 1. Could not perform a full screening for immunodeficiency.<br>2. Could not eliminate the possibility of cystic fibrosis                                                | 1. Patients with immunodeficiency were more vulnerable to NTM infection.<br>2. CF patients might not be completely excluded.                                    | Low          |
| <b>5.* Máiz, et al. 2016; Spain [5]</b>    | <b>Prospective cohort study</b>             | <b>Source bias</b>                  | <b>Population selection</b> | <b>An observational study of historical cohorts from 4 Spanish teaching hospitals with multidisciplinary and standardized non-CF bronchiectasis outpatient clinics.</b> | <b>1. Patients were outpatients, causing severe patients excluded.<br/>2. No unified standard for patient selection.</b>                                        | <b>High</b>  |
| 6. Izhakian, et al. 2016; Israel [6]       | Retrospective cohort study                  | Performance bias;<br>Selection bias | Population selection        | 1.The study precluded patients not under medical care<br>2.The study is not generalizable to patients treated by other hospital staff members.                          | 1. Patients were in hospital with severe symptoms, causing outpatients excluded.<br>2. Patients at the same location but from other hospital were not included. | Medium       |
| 7. Faverio, et al. 2016; Italy [7]         | Prospective cohort study                    | Selection bias                      | Population selection        | Data were from outpatient clinic and only patients in a stable state were recruited.                                                                                    | Severe patients were excluded for data analysis.                                                                                                                | Medium       |
| 8. Buscot, et al. 2016; France [8]         | Retrospective cohort study                  | Attrition bias                      | Follow-up                   | Functional follow-up was available in 30% of patients with a median duration of 2.7 years.                                                                              | Only 30% of patients could be followed up, cause attrition bias.                                                                                                | Low          |
| 9. Dimakou, et al. 2016; Greece [9]        | Prospective cohort study                    | Detection bias                      | Detection methods           | CF screening, sweat test, saccharin test, and electron microscopy and etc. were employed for patients with different symptoms.                                          | A standard detection method is better for diagnosis and study.                                                                                                  | Low          |

| Study                                       | Design                                | Bias Domain                    | Source of bias                                   | Support for Judgement                                                                                                                                                                                                     | Review Author's Judgement                                                                                                                                                                                              | Risk of Bias |
|---------------------------------------------|---------------------------------------|--------------------------------|--------------------------------------------------|---------------------------------------------------------------------------------------------------------------------------------------------------------------------------------------------------------------------------|------------------------------------------------------------------------------------------------------------------------------------------------------------------------------------------------------------------------|--------------|
| 10.* Park et al. 2016; Korean [10]          | Retrospective cohort study            | Source bias                    | Patient selection                                | The author only included the Non-CF bronchiectasis patients with followed- up for a minimum of 5 years with CT.                                                                                                           | The patients were not selected randomly, but have been sick for more than 5 years, causing an overestimate of the prevalence of NTM.                                                                                   | High         |
| 11.* Aksamit, et al. 2017; US [11]          | Retrospective cohort study            | Source bias                    | Data source                                      | Data was from Bronchiectasis Research Registry (BRR).                                                                                                                                                                     | The cohort of patients enrolled from tertiary referral institutions with interest in NTM lung disease, the demographic information described is potentially biased, including overrepresentation of patients with NTM. | High         |
| 12.* Hsieh, et al. 2018; Taiwan, China [12] | Retrospective cohort study            | Source bias; Selection bias    | Data source and sample size                      | 1. All 96 patients were from Linkou Medical Center. Patients with previous pulmonary tuberculosis and those who had received anti-NTM therapy were excluded. 2. Small sample population (<100).                           | Cases from medical center have source bias; Exclusion of some patients causes selection bias.                                                                                                                          | High         |
| 13. Sin, et al. 2019; South Korea [13]      | Retrospective controlled cohort study | Detection bias                 | False positive                                   | They diagnosed by the isolation of NTM from a respiratory specimen at least once.                                                                                                                                         | Isolation of NTM only once may increase the prevalence due to false positive, causing higher infection rates.                                                                                                          | Medium       |
| 14.* Amorim, et al. 2019; Portugal [14]     | Prospective cohort study              | Source bias; performance bias  | Patient selection and sample size                | 1. The data was from a bronchiectasis referral center. 2. The sample size is lower than 200.                                                                                                                              | Cases from a bronchiectasis referral center have source bias; lower sample size increased the prevalence of NTM.                                                                                                       | High         |
| 15.* Visser, et al. 2019; Australia [15]    | Prospective cohort study              | Selection bias; Attrition bias | Patient selection<br>Incomplete and missing data | 1. Potentially selects patients with prominent symptoms, more severe disease, and/or a higher prevalence of NTM. 2. predominantly represents non-indigenous patients 3. Patients with missing variable data were removed. | 1. Severe patients with prominent symptoms may cause a higher prevalence of NTM. 2. Non-indigenous patients did not represent the whole population 3. Data completeness limits the number of participants.             | High         |
| 16. Pieters et al. 2019; Netherland [16]    | Retrospective cohort study            | Performance bias               | Incomplete data                                  | The majority of patients were seen every 3 months at the outpatient clinic.                                                                                                                                               | Not all the patients were seen every 3 months at the outpatient clinic.                                                                                                                                                | Low          |

| Study                                      | Design                     | Bias Domain                        | Source of bias                                 | Support for Judgement                                                                                                                                                                                                                                           | Review Author's Judgement                                                                                                             | Risk of Bias |
|--------------------------------------------|----------------------------|------------------------------------|------------------------------------------------|-----------------------------------------------------------------------------------------------------------------------------------------------------------------------------------------------------------------------------------------------------------------|---------------------------------------------------------------------------------------------------------------------------------------|--------------|
| 17.* Dhar, et al. 2019; India [17]         | Prospective cohort study   | Source Bias                        | Patient selection                              | All the patients were from Indian bronchiectasis registry centers.                                                                                                                                                                                              | Patients from registry centers would inevitably cause an overestimation of the prevalence of NTM infections.                          | High         |
| 18. Huang, et al. 2020; Taiwan, China [18] | Retrospective cohort study | Source bias; Detection bias        | Patient Selection                              | 1. Inability to completely confirm the bronchiectasis diagnosis. 2. A portion of bronchiectasis diagnoses based on clinical symptoms and chest radiographs, not a reliable diagnostic tool. 3. underestimated the prevalence of immunodeficiency in our cohort. | Some patients might not be bronchiectasis; immunodeficiency may cause high prevalence due to vulnerability.                           | Medium       |
| 19. Darwish, et al. 2020; Egypt [19]       | Prospective cohort study   | Detection bias<br>Performance bias | NTM were detected by PCR Too small sample size | 1. The sputum samples were assessed by PCR, and positive cases did another PCR after 2 months. 2. Sample size 40 < 200                                                                                                                                          | PCR may cause false positive. The only study (of all 13 studies) NTM was not diagnosed by MBC; Small sample size increased prevalence | Medium       |
| 20.* Kwak, et al. 2020; South Korea [20]   | Prospective cohort study   | Source Bias                        | Patient selection                              | Only the patients without NTM infection were included, and then studied their NTM infection afterwards.                                                                                                                                                         | The patients are not random cases.                                                                                                    | High         |
| 21. Sharif, et al. 2020; Pakistan [21]     | Prospective cohort study   | Source bias                        | Patient selection                              | This observational cohort study was conducted in the inpatient department only.                                                                                                                                                                                 | Inpatients were usually with severe symptoms, and that may cause overestimation.                                                      | Low          |
| 22.* Choate, et al. 2021; US [22]          | Retrospective cohort study | Source Bias                        | Patient selection                              | All the patients were from the bronchiectasis and NTM Research Registry (BRR).                                                                                                                                                                                  | Patients from registry centers would cause an overestimation of the prevalence of NTM infections.                                     | High         |
| 23.* Metersky et al. 2021; US [23]         | Prospective cohort study   | Source Bias                        | Patient selection                              | All the patients were from the bronchiectasis and NTM Research Registry (BRR).                                                                                                                                                                                  | Patients from registry centers would cause an overestimation of the prevalence of NTM infections.                                     | High         |
| 24. Yin, et al. 2021; China [24]           | Retrospective cohort study | Performance bias                   | Patient information collection                 | Much patient information was self-reported and recorded.                                                                                                                                                                                                        | The self-reported information might be inaccurate and hidden.                                                                         | low          |

**Note:** Bold type with an asterisk \* indicate the studies with source/selection bias.

**Table S4: Statistics and calculation of NTM subspecies**

| Subspecies of NTM              | Number of Studies | All NTM Isolated Patient* | Patients with NTM subspecies | % of NTM Subspecies ** | McShane    | Kadowaki   | Máiz       | Izhakian   | Faverio    | Kwak       | Darwish   | Buscot     | Dimakou    | Metersky   | Yin        | % of NTM Isolated patients |
|--------------------------------|-------------------|---------------------------|------------------------------|------------------------|------------|------------|------------|------------|------------|------------|-----------|------------|------------|------------|------------|----------------------------|
| MAC                            | 11                | 255                       | 193                          | 75.687                 | 7          | 28         | 9          | 14         | 24         | 29         | 2         | 7          | 2          | 40         | 31         |                            |
| M. simiae                      | 3                 | 56                        | 10                           | 17.857                 | 1          |            | 1          | 8          |            |            |           |            |            |            |            |                            |
| M. gordonae                    | 3                 | 59                        | 7                            | 11.864                 | 1          |            | 2          |            | 4          |            |           |            |            |            |            |                            |
| M. xenopi                      | 1                 | 9                         | 1                            | 11.111                 | 1          |            |            |            |            |            |           |            |            |            |            |                            |
| M. fortuitum                   | 4                 | 103                       | 7                            | 6.796                  | 1          |            | 2          | 2          |            |            |           |            |            | 2          |            |                            |
| M. abscessus                   | 6                 | 208                       | 21                           | 10.096                 |            |            | 3          | 3          | 1          | 3          |           |            |            | 1          | 10         |                            |
| M. chelonae                    | 6                 | 182                       | 11                           | 6.044                  | 1          |            | 1          | 2          | 2          |            |           |            |            | 2          | 3          |                            |
| M. lentiflavum                 | 1                 | 18                        | 1                            | 5.556                  |            |            | 1          |            |            |            |           |            |            |            |            |                            |
| M. kansasii                    | 3                 | 88                        | 5                            | 4.88                   | 1          |            |            |            | 1          |            |           |            |            |            | 3          |                            |
| M. terrae                      | 1                 | 47                        | 1                            | 2.128                  |            |            |            |            |            |            |           |            |            | 1          |            |                            |
| M. shimoidei                   | 1                 | 32                        | 1                            | 3.125                  |            |            |            |            | 1          |            |           |            |            |            |            |                            |
| Undetermined                   | 3                 | 82                        | 6                            | 7.317                  |            |            |            |            |            | 4          | 1         |            |            | 1          |            |                            |
| <b>Sum (person)</b>            | <b>7</b>          | <b>1139</b>               |                              |                        | <b>9</b>   | <b>26</b>  | <b>18</b>  | <b>29</b>  | <b>32</b>  | <b>35</b>  | <b>3</b>  | <b>7</b>   | <b>2</b>   | <b>47</b>  | <b>47</b>  |                            |
| <b>sum (time)</b>              |                   |                           |                              |                        | <b>13</b>  | <b>28</b>  | <b>19</b>  | <b>29</b>  | <b>33</b>  | <b>36</b>  | <b>3</b>  | <b>7</b>   | <b>2</b>   | <b>47</b>  | <b>47</b>  |                            |
| <b>Bronchiectasis Patients</b> |                   |                           |                              |                        | <b>106</b> | <b>147</b> | <b>218</b> | <b>339</b> | <b>162</b> | <b>221</b> | <b>40</b> | <b>196</b> | <b>205</b> | <b>410</b> | <b>202</b> | <b>50.712</b>              |

Note: Of all 14 included studies, only 9 provided detection methods of NTM subspecies. \*The number of all NTM is the sum of all the patients in the studies with the subspecies. \*\*The percentage (%) of NTM infected patients is the sum of all patients with NTM infection divided by the sum of all bronchiectasis patients in all the 9 studies.



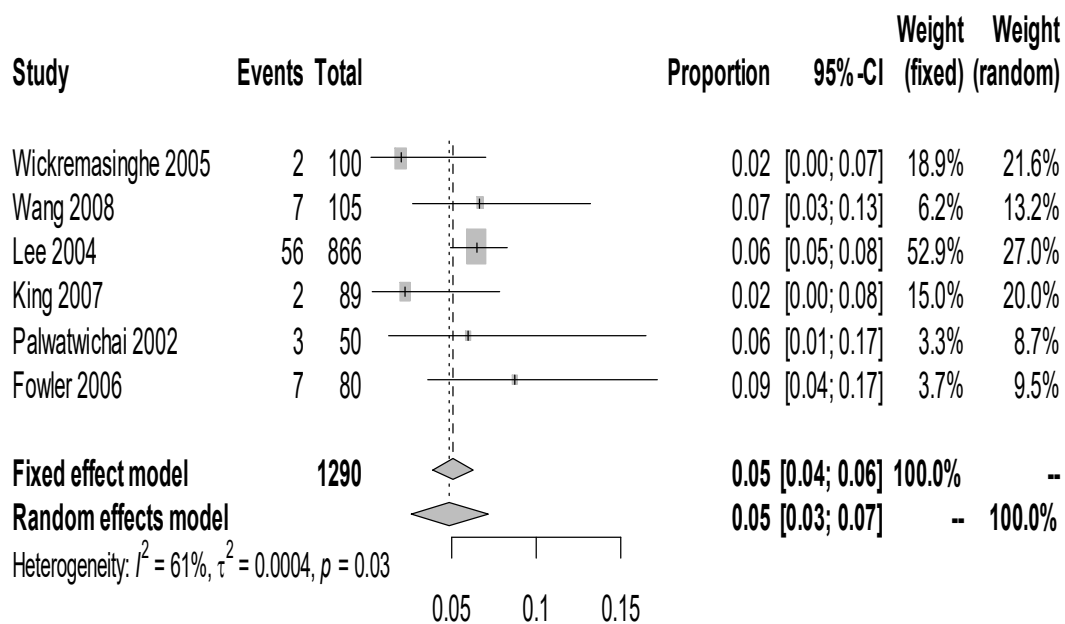

**Figure S1:** Re-calculating the prevalence of NTM in adults with non-cystic fibrosis bronchiectasis from 1990 to 2006 in Chu's paper "Prevalence of nontuberculous mycobacteria in patients with bronchiectasis: A meta-analysis" published in 2014 [25].

## References

- 1 McShane PJ, Naureckas ET, Strek ME. Bronchiectasis in a Diverse US Population. *Chest* 2012;**142**:159–67. doi:10.1378/chest.11-1024
- 2 Xu J-F, Ji X-B, Fan L-C, *et al.* Nontuberculous mycobacteria lung infection in bronchiectasis in China: Prevalence and clinical characteristics. *Am J Respir Crit Care Med* 2014;:D109.<http://www.embase.com/search/results?subaction=viewrecord&from=export&id=L71677790%5Cnhttp://dx.doi.org/10.1111/resp.12416%5Cnhttp://sfx.library.uu.nl/utrecht?sid=EMBASE&issn=13237799&id=doi:10.1111/resp.12416&atitle=Nontuberculous+mycobacteria+lung+infec>
- 3 Guan W, Gao Y, Xu G, *et al.* Aetiology of bronchiectasis in Guangzhou, southern China. *Respirology* 2015;**20**:739–48. doi:10.1111/resp.12528
- 4 Kadowaki T, Yano S, Wakabayashi K, *et al.* An analysis of etiology, causal pathogens, imaging patterns, and treatment of Japanese patients with bronchiectasis. *Respir Investig* 2015;**53**:37–44. doi:10.1016/j.resinv.2014.09.004
- 5 Máiz L, Girón R, Olveira C, *et al.* Prevalence and factors associated with nontuberculous mycobacteria in non-cystic fibrosis bronchiectasis: A multicenter observational study. *BMC Infect Dis* 2016;**16**:1–7. doi:10.1186/s12879-016-1774-x
- 6 Izhakian S, Wasser WG, Fuks L, *et al.* Lobar distribution in non-cystic fibrosis bronchiectasis predicts bacteriologic pathogen treatment. *Eur J Clin Microbiol Infect Dis* 2016;**35**:791–6.<http://ovidsp.ovid.com/ovidweb.cgi?T=JS&CSC=Y&NEWS=N&PAGE=fulltext&D=med12&AN=26873379>
- 7 Faverio P, Stainer A, Bonaiti G, *et al.* Characterizing Non-Tuberculous Mycobacteria Infection in Bronchiectasis. *Int J Mol Sci* 2016;**17**:16.<http://ovidsp.ovid.com/ovidweb.cgi?T=JS&CSC=Y&NEWS=N&PAGE=fulltext&D=med12&AN=27854334>
- 8 Buscot M, Pottier H, Marquette C-H, *et al.* Phenotyping Adults with Non-Cystic Fibrosis Bronchiectasis: A 10-Year Cohort Study in a French Regional University Hospital Center. *Respiration* 2016;**92**:1–8. doi:10.1159/000446923
- 9 Dimakou K, Triantafillidou C, Toumbis M, *et al.* Non CF-bronchiectasis: Aetiologic approach, clinical, radiological, microbiological and functional profile in 277 patients. *Respir Med* 2016;**116**:1–7. doi:10.1016/j.rmed.2016.05.001
- 10 Park J, Kim S, Lee YJ, *et al.* Factors associated with radiologic progression of non-cystic fibrosis bronchiectasis during long-term follow-up. *Respirology* 2016;**21**:1049–54. doi:10.1111/resp.12768
- 11 Aksamit TR, O'Donnell AE, Barker A, *et al.* Adult Patients With Bronchiectasis: A First Look at the US Bronchiectasis Research Registry. *Chest* 2017;**151**:982–92.<http://ovidsp.ovid.com/ovidweb.cgi?T=JS&CSC=Y&NEWS=N&PAGE=fulltext&D=med13&AN=27889361>
- 12 Hsieh MH, Lin CY, Wang CY, *et al.* Impact of concomitant nontuberculous mycobacteria and pseudomonas aeruginosa isolates in non-cystic fibrosis bronchiectasis. *Infect Drug Resist* 2018;**11**:1137–43. doi:10.2147/IDR.S169789

- 13 Sin S, Yun SY, Kim JM, *et al.* Mortality risk and causes of death in patients with non-cystic fibrosis bronchiectasis. *Respir Res* 2019;**20**:271. <http://ovidsp.ovid.com/ovidweb.cgi?T=JS&CSC=Y&NEWS=N&PAGE=fulltext&D=prem&AN=31796019>
- 14 Amorim A, Meira L, Redondo M, *et al.* Chronic Bacterial Infection Prevalence, Risk Factors, and Characteristics: A Bronchiectasis Population-Based Prospective Study. *J Clin Med* 2019;**8**:315. doi:10.3390/jcm8030315
- 15 Visser SK, Bye PTP, Fox GJ, *et al.* Australian adults with bronchiectasis: The first report from the Australian Bronchiectasis Registry. *Respir Med* 2019;**155**:97–103. doi:10.1016/j.rmed.2019.07.016
- 16 Pieters A, Bakker M, Hoek RAS, *et al.* Predicting factors for chronic colonization of *Pseudomonas aeruginosa* in bronchiectasis. *Eur J Clin Microbiol Infect Dis* 2019;**38**:2299–304. doi:10.1007/s10096-019-03675-z
- 17 Dhar R, Singh S, Talwar D, *et al.* Bronchiectasis in India: results from the European Multicentre Bronchiectasis Audit and Research Collaboration (EMBARC) and Respiratory Research Network of India Registry. *Lancet Glob Heal* 2019;**7**:e1269–79. doi:10.1016/S2214-109X(19)30327-4
- 18 Huang H-Y, Chung F-T, Lo C-Y, *et al.* Etiology and characteristics of patients with bronchiectasis in Taiwan: a cohort study from 2002 to 2016. *BMC Pulm Med* 2020;**20**:45. doi:10.1186/s12890-020-1080-7
- 19 Darwish A., El Mahalawy I, El Dahdouh S., *et al.* Nontuberculous mycobacterium as a hidden cause of noncystic fibrosis bronchiectasis. *Egypt J Chest Dis Tuberc* 2020;**69**:46. doi:10.4103/ejcdt.ejcdt\_75\_19
- 20 Kwak N, Lee JH, Kim H-J, *et al.* New-onset nontuberculous mycobacterial pulmonary disease in bronchiectasis: tracking the clinical and radiographic changes. *BMC Pulm Med* 2020;**20**:293. doi:10.1186/s12890-020-01331-3
- 21 Sharif N, Baig MS, Sharif S, *et al.* Etiology, Clinical, Radiological, and Microbiological Profile of Patients with Non-cystic Fibrosis Bronchiectasis at a Tertiary Care Hospital of Pakistan. *Cureus* 2020;**12**. doi:10.7759/cureus.7208
- 22 Choate R, Aksamit TR, Mannino D, *et al.* *Pseudomonas aeruginosa* associated with severity of non-cystic fibrosis bronchiectasis measured by the modified bronchiectasis severity score (BSI) and the FACED: The US bronchiectasis and NTM Research Registry (BRR) study. *Respir Med* 2021;**177**:106285. doi:10.1016/j.rmed.2020.106285
- 23 Metersky ML, Choate R, Addrizzo-Harris D, *et al.* The Association of Long-term Macrolide Therapy and Nontuberculous Mycobacterial Culture Positivity in Patients With Bronchiectasis. *Chest* 2021;**160**:466–9. doi:10.1016/j.chest.2021.02.019
- 24 Yin H, Gu X, Wang Y, *et al.* Clinical characteristics of patients with bronchiectasis with nontuberculous mycobacterial disease in Mainland China: a single center cross-sectional study. *BMC Infect Dis* 2021;**21**:1216. doi:10.1186/s12879-021-06917-8
- 25 Chu H, Zhao L, Xiao H, *et al.* Prevalence of nontuberculous mycobacteria in patients with bronchiectasis: A meta-analysis. *Arch Med Sci* 2014;**10**:661–8. doi:10.5114/aoms.2014.44857
